# Supplementary material for: How Unawareness of Weight Excess Can Increase Cardiovascular Risk?
Source: MDPI journal article supplement (doi:10.3390/jcm11174944), 2022-08-23

## Supplementary materials

**Table S1:** Clinical characteristics of the study population: Atherosclerotic plaques, Diabetes Mellitus.

| Variables               | Total population<br>[N/%] | Normal weight (I)<br>[N/%] | Unawareness of overweight and obesity (II)<br>[N/%] | Awareness of overweight and obesity (III)<br>[N/%] | P-value * | Pairwise comparisons** |        |        |
|-------------------------|---------------------------|----------------------------|-----------------------------------------------------|----------------------------------------------------|-----------|------------------------|--------|--------|
|                         |                           |                            |                                                     |                                                    |           | IvsII                  | IvsIII | IvsIII |
|                         | N=658                     | N=256                      | N=143                                               | N=259                                              |           |                        |        |        |
| Atherosclerotic plaques | 297 (45.1)                | 80 (31.3)                  | 72 (49.7)                                           | 145 (56.4)                                         | <0.001    | sig.                   | sig.   |        |
|                         | N=640                     | N=250                      | N=136                                               | N=254                                              |           |                        |        |        |
| DM from the interview   | 47 (7.3)                  | 5 (2.0)                    | 10 (7.4)                                            | 32 (12.6)                                          | 0.153     | sig.                   |        |        |
| Newly diagnosed DM      | 42 (6.6)                  | 7 (2.8)                    | 10 (7.4)                                            | 25 (9.8)                                           | 0.271     |                        |        |        |

The data are shown as N/%; DM - diabetes mellitus; newly diagnosed DM - diabetes diagnosed in the study;

\* Pearson's  $\chi^2$  test

\*\* tests for 2 proportions with Bonferroni correction

sig. - test result statistically significant after application of Bonferroni correction for multiple comparisons with family-wise error rate of 0.05

**Table S2:** Family history – obese family members.

| Variables         | Total population<br>[N/%] | Normal weight (I)<br>[N/%] | Unawareness of overweight and obesity (II)<br>[N/%] | Awareness of overweight and obesity (III)<br>[N/%] | P-value * | Pairwise comparisons** |        |        |
|-------------------|---------------------------|----------------------------|-----------------------------------------------------|----------------------------------------------------|-----------|------------------------|--------|--------|
|                   |                           |                            |                                                     |                                                    |           | IvsII                  | IvsIII | IvsIII |
| Obesity in family | 176 (30.9)                | 57 (24.9)                  | 29 (25.4)                                           | 90 (39.6)                                          | 0.001     |                        | sig.   | sig.   |
| Mother's obesity  | 78 (13.7)                 | 20 (8.7)                   | 17 (14.9)                                           | 41 (18.1)                                          | 0.014     |                        |        | sig.   |
| Father's obesity  | 60 (10.5)                 | 16 (7.0)                   | 10 (8.8)                                            | 34 (15.0)                                          | 0.017     |                        | sig.   |        |
| Sister's obesity  | 28 (4.9)                  | 6 (2.6)                    | 2 (1.8)                                             | 20 (8.8)                                           | 0.008     |                        | sig.   | sig.   |
| Brother's obesity | 25 (4.4)                  | 4 (1.7)                    | 2 (1.8)                                             | 19 (8.4)                                           | 0.001     |                        | sig.   | sig.   |

The data are shown as N/%

\* Pearson's  $\chi^2$  test

\*\* tests for 2 proportions with Bonferroni correction

sig. - test result statistically significant after application of Bonferroni correction for multiple comparisons with family-wise error rate of 0.05

**Figure S1:** The perception of overweight and obesity among women and men in ROC curves.

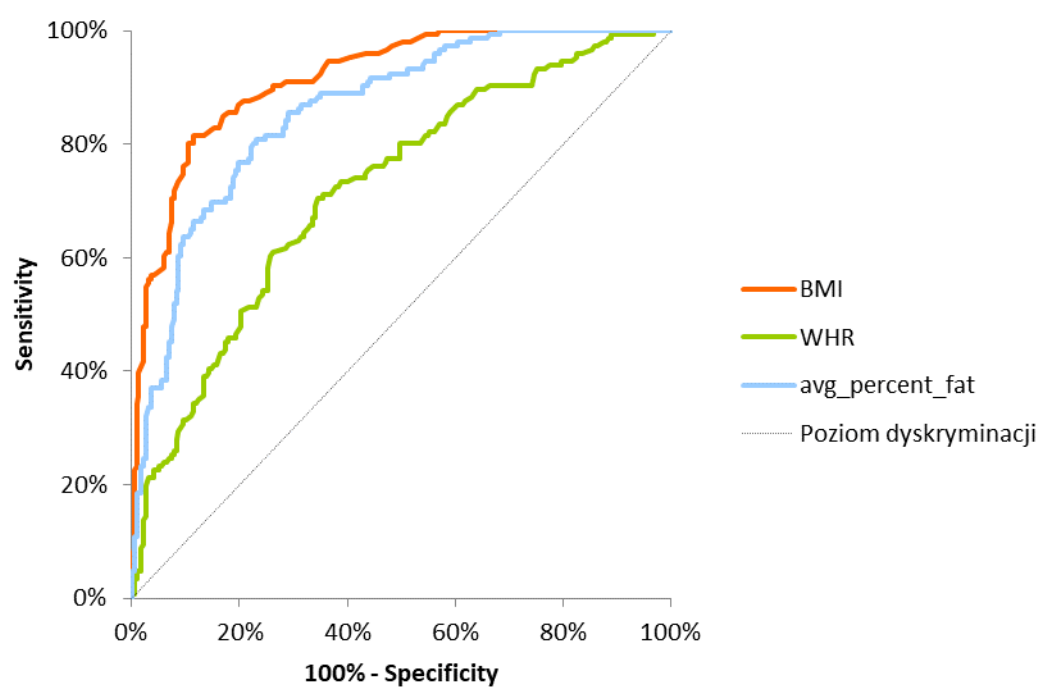

Supplement: s1 [file s1]
